# Supplementary material
Source: PubMed Central journal article supplement (PMC2756022)
Supplement: NIHMS123904-supplement-Supp_Figures.pdf [file NIHMS123904-supplement-Supp_Figures.pdf]

## Supplementary Figure 1

### pRep-Feo replicon

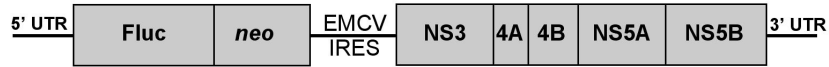

### OR6 replicon

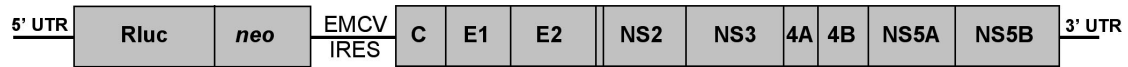

**Supplementary Figure 1 | Schematic of the pRep-Feo subgenomic replicon and the OR6 full-length replicon.** pRep-Feo encodes a firefly luciferase reporter, while OR6 encodes a Renilla luciferase reporter upstream of HCV sequences. C, HCV core; E1 and E2, envelope proteins; NS2-NS5B, nonstructural proteins.

**Supplementary Figure 2**

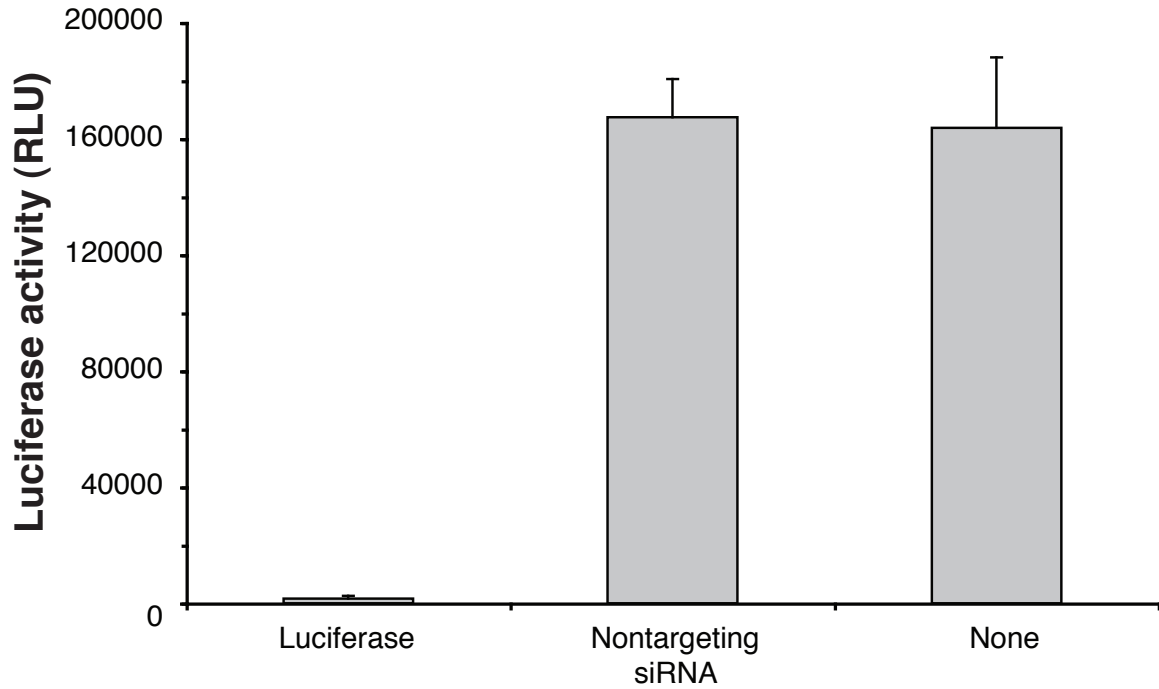

**Supplementary Figure 2 | Validation of high-throughput siRNA transfection.** Huh7/Rep-Feo cells were transfected in 384-well format with no siRNA, a nontargeting control siRNA, or a positive control luciferase siRNA. Firefly luciferase activity was assayed 72 hours after transfection. Values represent mean of 96 wells  $\pm$  SD.

### Supplementary Figure 3

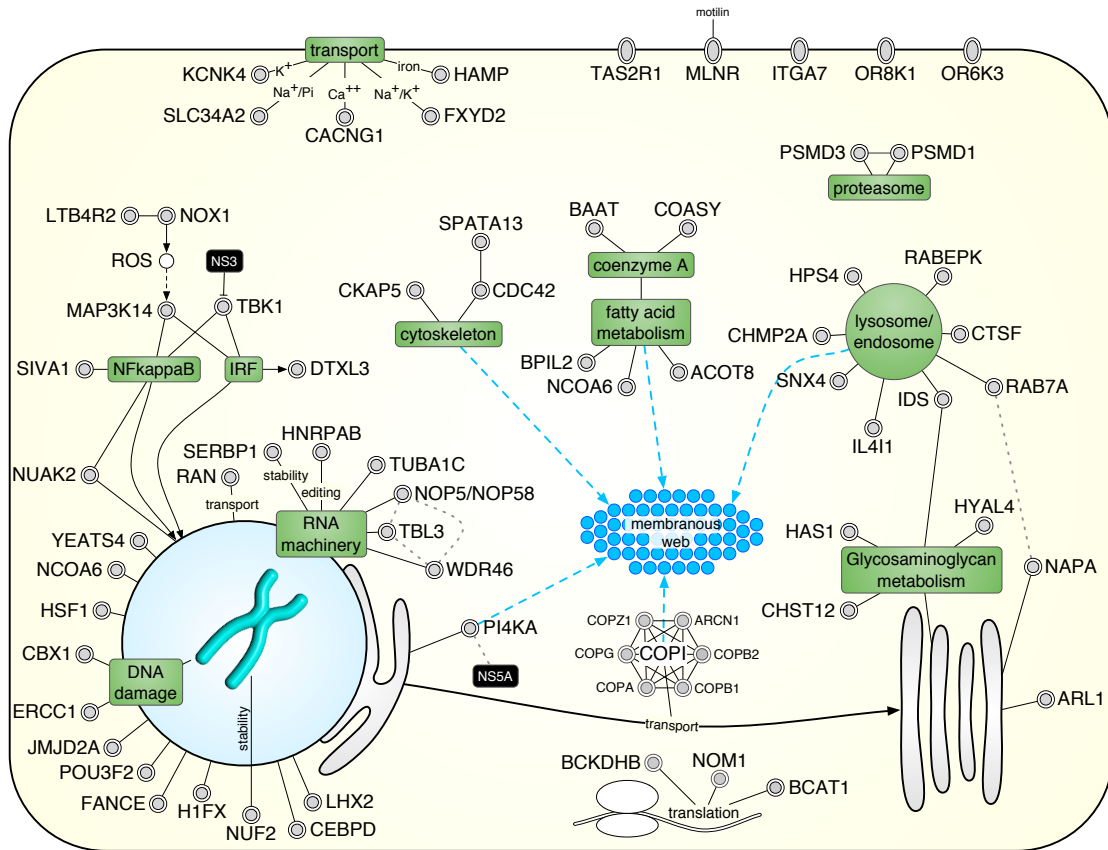

**Figure S3 | Functional and subcellular localization mapping of HCV cofactors.** The scientific literature and gene annotation for each of the 96 HCV cofactors that were identified in the screen was reviewed (see methods). Genes were preferentially placed according to their functional role that was most relevant in the context of HCV replication. Black arrows indicate activation; dotted gray lines indicate protein-protein interactions; dotted blue lines indicate processes that impinge on membranous web structures; green boxes indicate cellular processes or compartments and black boxes indicate HCV proteins. Supporting references are listed in Table S5.
